# Supplementary material for: SinR is a mutational target for fine-tuning biofilm formation in laboratory-evolved strains of Bacillus subtilis
Source: PubMed Central journal article supplement (PMC4258274; doi:10.1186/s12866-014-0301-8), 2014-11-30

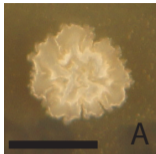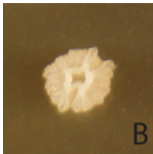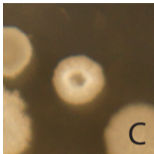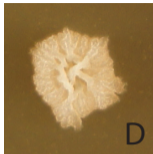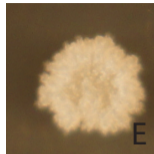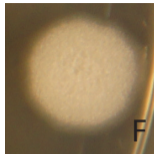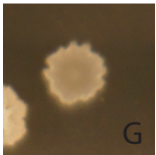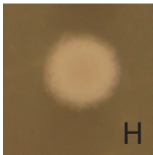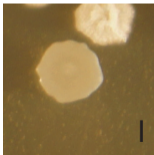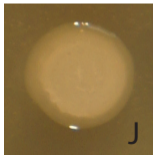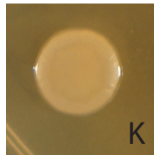

Supplement: 12866_2014_301_MOESM1_ESM.pdf [file 12866_2014_301_MOESM1_ESM.pdf]
